# Supplementary material
Source: PubMed Central journal article supplement (PMC8049978)
Supplement: NIHMS1675222-supplement-318170_Major_Resources_Table.pdf [file NIHMS1675222-supplement-318170_Major_Resources_Table.pdf]

## Major Resources Table

In order to allow validation and replication of experiments, all essential research materials listed in the Methods should be included in the Major Resources Table below. Authors are encouraged to use public repositories for protocols, data, code, and other materials and provide persistent identifiers and/or links to repositories when available. Authors may add or delete rows as needed.

### Animals (in vivo studies)

| Species           | Vendor or Source                            | Background Strain | Sex | Persistent ID / URL |
|-------------------|---------------------------------------------|-------------------|-----|---------------------|
| CASK_flox MHC_Cre | Own (based on CASKtm1sud of the Südhof Lab) | C57BLJ            | m   | not available yet   |
|                   |                                             |                   |     |                     |
|                   |                                             |                   |     |                     |

### Genetically Modified Animals

|                        | Species           | Vendor or Source | Background Strain | Other Information                     | Persistent ID / URL |
|------------------------|-------------------|------------------|-------------------|---------------------------------------|---------------------|
| <b>Parent - Male</b>   | CASK_flox MHC_Cre | Own lab          | C57BLJ            | based on CASKtm1sud of the Südhof Lab | not available yet   |
| <b>Parent - Female</b> | CASK_flox MHC_Cre | Own lab          | C57BLJ            | based on CASKtm1sud of the Südhof Lab | not available yet   |

### Antibodies

| Target antigen                                             | Vendor or Source   | Catalog #                                       | Working concentration | Lot # (preferred but not required) | Persistent ID / URL |
|------------------------------------------------------------|--------------------|-------------------------------------------------|-----------------------|------------------------------------|---------------------|
| anti-CASK                                                  | StressMarq & Abcam | S56A-50 (discontinued) & AB11343 (discontinued) | 1:2000 (Western)      | n/a                                | n/a                 |
| anti-NaV1.5                                                | Alomone            | ASC-013                                         |                       | n/a                                | n/a                 |
| anti-CaMKII                                                | Don Bers' lab      | n/a                                             | 1:1200                | n/a                                | n/a                 |
| anti-phospho-threonin-286-CaMKII                           | Thermo Fisher      | MA1-047                                         | 1:1000                | n/a                                | n/a                 |
| anti-phospho-threonin305-CaMKII                            | Antibodies online  | n/a discontinued                                | 1:1000                | n/a                                | n/a                 |
| anti-phospho-threonin17-PLN                                | Badrilla           | A010-13AP                                       | 1:10000               | n/a                                | n/a                 |
| monoclonal anti-PLN                                        | Milipore           | n/a                                             | 1:10000               | n/a                                | n/a                 |
| anti-RyR2                                                  | Sigma              | HPA020028                                       | 1:10000               | n/a                                | n/a                 |
| anti-phospho-serin2814-RyR                                 | Badrilla           | A010-31AP                                       | 1:10000               | n/a                                | n/a                 |
| anti-SERCA                                                 | Thermo Scientific  | MA3-919                                         | 1:20000               | n/a                                | n/a                 |
| anti-GAPDH                                                 | Biotrend           | BT46-9995-55                                    | 1:50000               | n/a                                | n/a                 |
| HRP-conjugated donkey anti-rabbit and sheep anti-mouse IgG | GE Healthcare      | NA934 & NA931                                   | 1:10000               | n/a                                | n/a                 |

DOI [to be added]

|                                                  |                     |     |         |     |     |
|--------------------------------------------------|---------------------|-----|---------|-----|-----|
| Immune serum directed against oxizided M281/M282 | Mark Anderson's lab | n/a | 1:15000 | n/a | n/a |
|--------------------------------------------------|---------------------|-----|---------|-----|-----|

**DNA/cDNA Clones**

| Clone Name     | Sequence | Source / Repository | Persistent ID / URL |
|----------------|----------|---------------------|---------------------|
| not applicable |          |                     |                     |
|                |          |                     |                     |
|                |          |                     |                     |

**Cultured Cells**

| Name           | Vendor or Source | Sex (F, M, or unknown) | Persistent ID / URL |
|----------------|------------------|------------------------|---------------------|
| not applicable |                  |                        |                     |
|                |                  |                        |                     |
|                |                  |                        |                     |

**Data & Code Availability**

| Description    | Source / Repository | Persistent ID / URL |
|----------------|---------------------|---------------------|
| not applicable |                     |                     |
|                |                     |                     |
|                |                     |                     |

**Other**

| Description    | Source / Repository | Persistent ID / URL |
|----------------|---------------------|---------------------|
| not applicable |                     |                     |
|                |                     |                     |
|                |                     |                     |
